# Supplementary material for: Polarizable AMOEBA force field predicts thin and dense hydration layer around monosaccharides
Source: Royal Society of Chemistry journal article supplement (doi:10.1039/d4cc04415k), 2024-01-01
Supplement: d4cc04415k1.pdf [file d4cc04415k1.pdf]

# Polarizable AMOEBA force field predicts thin and dense hydration layer around monosaccharides.

Luke A. Newman, Mackenzie Patton, Breyanna Rodriguez, Ethan Sumner, and  
Valerie Vaissier Welborn\*

E-mail: vwelborn@vt.edu

## MD input file availability

Poltype 2 and Tinker 9 input with parameters files are available at  
<https://github.com/WelbornGroup/>.

## Average bond, angle and dihedrals for monosaccharides in water

Table 1: Bond lengths reported in Å as averages over 145 ns of MD in the NPT ensemble (after 5 ns equilibration). The error is the standard deviation.

| Bond  | $\beta$ -Glc |             | $\beta$ -GlcN |             | $\beta$ -GlcNAc |             | Exp  |
|-------|--------------|-------------|---------------|-------------|-----------------|-------------|------|
|       | mutual pol.  | no pol.     | mutual pol.   | no pol.     | mutual pol.     | no pol.     |      |
| C1-C2 | 1.54 ± 0.04  | 1.53 ± 0.03 | 1.53 ± 0.04   | 1.53 ± 0.04 | 1.56 ± 0.04     | 1.56 ± 0.04 | 1.52 |
| C2-C3 | 1.55 ± 0.04  | 1.54 ± 0.03 | 1.56 ± 0.04   | 1.56 ± 0.04 | 1.53 ± 0.04     | 1.53 ± 0.04 | 1.53 |
| C3-C4 | 1.55 ± 0.04  | 1.55 ± 0.03 | 1.53 ± 0.04   | 1.53 ± 0.04 | 1.56 ± 0.04     | 1.56 ± 0.04 | 1.52 |
| C4-C5 | 1.57 ± 0.04  | 1.57 ± 0.03 | 1.56 ± 0.04   | 1.57 ± 0.04 | 1.56 ± 0.04     | 1.56 ± 0.04 | 1.53 |
| C5-C6 | 1.54 ± 0.04  | 1.53 ± 0.04 | 1.54 ± 0.04   | 1.55 ± 0.04 | 1.54 ± 0.04     | 1.55 ± 0.04 | 1.51 |
| C1-O1 | 1.41 ± 0.03  | 1.41 ± 0.03 | 1.42 ± 0.03   | 1.42 ± 0.03 | 1.40 ± 0.03     | 1.40 ± 0.03 | 1.40 |
| C2-O2 | 1.45 ± 0.04  | 1.44 ± 0.03 | 1.48 ± 0.03   | 1.49 ± 0.03 | 1.47 ± 0.03     | 1.47 ± 0.03 | 1.43 |
| C3-O3 | 1.45 ± 0.04  | 1.43 ± 0.03 | 1.47 ± 0.04   | 1.46 ± 0.04 | 1.45 ± 0.04     | 1.45 ± 0.04 | 1.43 |

|       |                 |                 |                 |                 |                 |                 |      |
|-------|-----------------|-----------------|-----------------|-----------------|-----------------|-----------------|------|
| C4-O4 | $1.45 \pm 0.04$ | $1.44 \pm 0.03$ | $1.45 \pm 0.04$ | $1.45 \pm 0.04$ | $1.46 \pm 0.04$ | $1.46 \pm 0.04$ | 1.43 |
| C5-O5 | $1.44 \pm 0.04$ | $1.46 \pm 0.05$ | $1.44 \pm 0.04$ | $1.44 \pm 0.04$ | $1.46 \pm 0.04$ | $1.46 \pm 0.04$ | 1.45 |
| C6-O6 | $1.45 \pm 0.04$ | $1.43 \pm 0.03$ | $1.45 \pm 0.04$ | $1.44 \pm 0.04$ | $1.44 \pm 0.04$ | $1.44 \pm 0.04$ | 1.42 |
| O5-C1 | $1.45 \pm 0.04$ | $1.43 \pm 0.04$ | $1.45 \pm 0.04$ | $1.45 \pm 0.04$ | $1.46 \pm 0.04$ | $1.46 \pm 0.04$ | 1.43 |

Table 2: Bond lengths reported in Å as averages over 145 ns of MD in the NPT ensemble (after 5 ns equilibration). The error is the standard deviation.

| Bond  | $\beta$ -Gal    |                 | $\beta$ -GalN   |                 | $\beta$ -GalNAc |                 | Exp  |
|-------|-----------------|-----------------|-----------------|-----------------|-----------------|-----------------|------|
|       | mutual pol.     | no pol.         | mutual pol.     | no pol.         | mutual pol.     | no pol.         |      |
| C1-C2 | $1.54 \pm 0.04$ | $1.55 \pm 0.04$ | $1.53 \pm 0.04$ | $1.55 \pm 0.04$ | $1.56 \pm 0.04$ | $1.57 \pm 0.04$ | 1.52 |
| C2-C3 | $1.55 \pm 0.04$ | $1.55 \pm 0.04$ | $1.56 \pm 0.04$ | $1.54 \pm 0.04$ | $1.54 \pm 0.04$ | $1.54 \pm 0.04$ | 1.53 |
| C3-C4 | $1.56 \pm 0.04$ | $1.57 \pm 0.04$ | $1.53 \pm 0.04$ | $1.57 \pm 0.04$ | $1.56 \pm 0.04$ | $1.57 \pm 0.04$ | 1.52 |
| C4-C5 | $1.56 \pm 0.04$ | $1.56 \pm 0.04$ | $1.56 \pm 0.04$ | $1.53 \pm 0.04$ | $1.55 \pm 0.04$ | $1.55 \pm 0.04$ | 1.53 |
| C5-C6 | $1.54 \pm 0.04$ | $1.55 \pm 0.04$ | $1.54 \pm 0.04$ | $1.55 \pm 0.04$ | $1.55 \pm 0.04$ | $1.55 \pm 0.04$ | 1.51 |
| C1-O1 | $1.41 \pm 0.03$ | $1.41 \pm 0.03$ | $1.42 \pm 0.03$ | $1.41 \pm 0.03$ | $1.40 \pm 0.03$ | $1.41 \pm 0.03$ | 1.40 |
| C2-O2 | $1.45 \pm 0.04$ | $1.45 \pm 0.04$ | $1.48 \pm 0.03$ | $1.48 \pm 0.03$ | $1.47 \pm 0.04$ | $1.47 \pm 0.03$ | 1.43 |
| C3-O3 | $1.45 \pm 0.04$ | $1.44 \pm 0.04$ | $1.47 \pm 0.04$ | $1.44 \pm 0.04$ | $1.45 \pm 0.04$ | $1.45 \pm 0.04$ | 1.43 |
| C4-O4 | $1.45 \pm 0.04$ | $1.45 \pm 0.04$ | $1.45 \pm 0.04$ | $1.45 \pm 0.04$ | $1.45 \pm 0.04$ | $1.45 \pm 0.04$ | 1.43 |
| C5-O5 | $1.44 \pm 0.04$ | $1.44 \pm 0.04$ | $1.44 \pm 0.04$ | $1.43 \pm 0.04$ | $1.43 \pm 0.04$ | $1.43 \pm 0.04$ | 1.45 |
| C6-O6 | $1.45 \pm 0.04$ | $1.44 \pm 0.04$ | $1.45 \pm 0.04$ | $1.44 \pm 0.04$ | $1.45 \pm 0.04$ | $1.44 \pm 0.04$ | 1.42 |
| O5-C1 | $1.45 \pm 0.04$ | $1.45 \pm 0.04$ | $1.45 \pm 0.04$ | $1.45 \pm 0.04$ | $1.45 \pm 0.04$ | $1.45 \pm 0.04$ | 1.43 |

Table 3: Bond lengths reported in Å as averages over 145 ns of MD in the NPT ensemble (after 5 ns equilibration). The error is the standard deviation.

| Bond  | $\alpha$ -Glc   |                 | $\alpha$ -GlcN  |                 | $\alpha$ -GlcNAc |                 | Exp  |
|-------|-----------------|-----------------|-----------------|-----------------|------------------|-----------------|------|
|       | mutual pol.     | no pol.         | mutual pol.     | no pol.         | mutual pol.      | no pol.         |      |
| C1-C2 | $1.56 \pm 0.04$ | $1.57 \pm 0.04$ | $1.53 \pm 0.04$ | $1.53 \pm 0.04$ | $1.55 \pm 0.04$  | $1.56 \pm 0.04$ | 1.52 |

|       |                 |                 |                 |                 |                 |                 |      |
|-------|-----------------|-----------------|-----------------|-----------------|-----------------|-----------------|------|
| C2-C3 | $1.52 \pm 0.04$ | $1.53 \pm 0.04$ | $1.54 \pm 0.04$ | $1.54 \pm 0.04$ | $1.54 \pm 0.04$ | $1.54 \pm 0.04$ | 1.53 |
| C3-C4 | $1.56 \pm 0.04$ | $1.56 \pm 0.04$ | $1.56 \pm 0.04$ | $1.56 \pm 0.04$ | $1.56 \pm 0.04$ | $1.56 \pm 0.04$ | 1.52 |
| C4-C5 | $1.58 \pm 0.04$ | $1.58 \pm 0.04$ | $1.58 \pm 0.04$ | $1.58 \pm 0.04$ | $1.57 \pm 0.04$ | $1.57 \pm 0.04$ | 1.53 |
| C5-C6 | $1.54 \pm 0.04$ | $1.55 \pm 0.04$ | $1.55 \pm 0.04$ | $1.55 \pm 0.04$ | $1.55 \pm 0.04$ | $1.55 \pm 0.04$ | 1.51 |
| C1-O1 | $1.41 \pm 0.03$ | $1.41 \pm 0.03$ | $1.41 \pm 0.03$ | $1.41 \pm 0.03$ | $1.43 \pm 0.03$ | $1.43 \pm 0.03$ | 1.40 |
| C2-O2 | $1.44 \pm 0.04$ | $1.45 \pm 0.04$ | $1.49 \pm 0.03$ | $1.49 \pm 0.03$ | $1.48 \pm 0.03$ | $1.48 \pm 0.03$ | 1.43 |
| C3-O3 | $1.45 \pm 0.04$ | $1.44 \pm 0.04$ | $1.44 \pm 0.04$ | $1.44 \pm 0.04$ | $1.45 \pm 0.04$ | $1.45 \pm 0.04$ | 1.43 |
| C4-O4 | $1.45 \pm 0.04$ | $1.45 \pm 0.04$ | $1.45 \pm 0.04$ | $1.45 \pm 0.04$ | $1.46 \pm 0.04$ | $1.45 \pm 0.04$ | 1.43 |
| C5-O5 | $1.48 \pm 0.04$ | $1.48 \pm 0.04$ | $1.45 \pm 0.04$ | $1.45 \pm 0.04$ | $1.45 \pm 0.04$ | $1.44 \pm 0.04$ | 1.45 |
| C6-O6 | $1.44 \pm 0.04$ | $1.44 \pm 0.04$ | $1.44 \pm 0.04$ | $1.44 \pm 0.04$ | $1.45 \pm 0.04$ | $1.44 \pm 0.04$ | 1.42 |
| O5-C1 | $1.45 \pm 0.04$ | $1.45 \pm 0.04$ | $1.46 \pm 0.04$ | $1.45 \pm 0.04$ | $1.45 \pm 0.04$ | $1.45 \pm 0.04$ | 1.43 |

Table 4: Bond lengths reported in Å as averages over 145 ns of MD in the NPT ensemble (after 5 ns equilibration). The error is the standard deviation.

| Bond  | $\alpha$ -Gal   |                 | $\alpha$ -GalN  |                 | $\alpha$ -GalNAc |                 | Exp  |
|-------|-----------------|-----------------|-----------------|-----------------|------------------|-----------------|------|
|       | mutual pol.     | no pol.         | mutual pol.     | no pol.         | mutual pol.      | no pol.         |      |
| C1-C2 | $1.56 \pm 0.04$ | $1.56 \pm 0.04$ | $1.56 \pm 0.04$ | $1.56 \pm 0.04$ | $1.56 \pm 0.04$  | $1.57 \pm 0.04$ | 1.52 |
| C2-C3 | $1.55 \pm 0.04$ | $1.55 \pm 0.04$ | $1.54 \pm 0.04$ | $1.54 \pm 0.04$ | $1.53 \pm 0.04$  | $1.54 \pm 0.04$ | 1.53 |
| C3-C4 | $1.56 \pm 0.04$ | $1.56 \pm 0.04$ | $1.52 \pm 0.04$ | $1.53 \pm 0.04$ | $1.56 \pm 0.04$  | $1.57 \pm 0.04$ | 1.52 |
| C4-C5 | $1.55 \pm 0.04$ | $1.55 \pm 0.04$ | $1.57 \pm 0.04$ | $1.58 \pm 0.04$ | $1.55 \pm 0.04$  | $1.55 \pm 0.04$ | 1.53 |
| C5-C6 | $1.54 \pm 0.04$ | $1.55 \pm 0.04$ | $1.55 \pm 0.04$ | $1.55 \pm 0.04$ | $1.55 \pm 0.04$  | $1.55 \pm 0.04$ | 1.51 |
| C1-O1 | $1.43 \pm 0.03$ | $1.43 \pm 0.03$ | $1.41 \pm 0.03$ | $1.41 \pm 0.03$ | $1.43 \pm 0.03$  | $1.43 \pm 0.03$ | 1.40 |
| C2-O2 | $1.45 \pm 0.04$ | $1.45 \pm 0.04$ | $1.49 \pm 0.04$ | $1.49 \pm 0.04$ | $1.47 \pm 0.04$  | $1.48 \pm 0.03$ | 1.43 |
| C3-O3 | $1.46 \pm 0.04$ | $1.45 \pm 0.04$ | $1.46 \pm 0.04$ | $1.46 \pm 0.04$ | $1.46 \pm 0.04$  | $1.46 \pm 0.04$ | 1.43 |
| C4-O4 | $1.46 \pm 0.04$ | $1.45 \pm 0.04$ | $1.47 \pm 0.04$ | $1.46 \pm 0.04$ | $1.45 \pm 0.04$  | $1.45 \pm 0.04$ | 1.43 |
| C5-O5 | $1.44 \pm 0.04$ | $1.44 \pm 0.04$ | $1.45 \pm 0.04$ | $1.45 \pm 0.04$ | $1.48 \pm 0.04$  | $1.48 \pm 0.04$ | 1.45 |
| C6-O6 | $1.45 \pm 0.04$ | $1.44 \pm 0.04$ | $1.45 \pm 0.04$ | $1.45 \pm 0.04$ | $1.45 \pm 0.04$  | $1.44 \pm 0.04$ | 1.42 |

|       |                 |                 |                 |                 |                 |                 |      |
|-------|-----------------|-----------------|-----------------|-----------------|-----------------|-----------------|------|
| O5-C1 | $1.46 \pm 0.04$ | $1.45 \pm 0.04$ | $1.48 \pm 0.04$ | $1.48 \pm 0.04$ | $1.44 \pm 0.04$ | $1.45 \pm 0.04$ | 1.43 |
|-------|-----------------|-----------------|-----------------|-----------------|-----------------|-----------------|------|

Table 5: Angle values reported in  $^{\circ}$  as averages over 145 ns of MD in the NPT ensemble (after 5 ns equilibration). The error is the standard deviation.

| Angle    | $\beta$ -Glc |             | $\beta$ -GlcN |             | $\beta$ -GlcNAc |             | Exp |
|----------|--------------|-------------|---------------|-------------|-----------------|-------------|-----|
|          | mutual pol.  | no pol.     | mutual pol.   | no pol.     | mutual pol.     | no pol.     |     |
| C1-C2-C3 | $109 \pm 3$  | $109 \pm 3$ | $108 \pm 2$   | $109 \pm 3$ | $109 \pm 3$     | $110 \pm 3$ | 110 |
| C2-C3-C4 | $110 \pm 3$  | $112 \pm 3$ | $111 \pm 3$   | $112 \pm 3$ | $111 \pm 3$     | $111 \pm 3$ | 110 |
| C3-C4-C5 | $110 \pm 3$  | $109 \pm 3$ | $109 \pm 3$   | $109 \pm 3$ | $110 \pm 3$     | $110 \pm 3$ | 110 |
| C4-C5-C6 | $114 \pm 3$  | $115 \pm 3$ | $114 \pm 3$   | $114 \pm 3$ | $114 \pm 3$     | $114 \pm 3$ | 113 |
| C4-C5-O5 | $109 \pm 3$  | $103 \pm 3$ | $109 \pm 3$   | $109 \pm 3$ | $109 \pm 3$     | $108 \pm 3$ | 109 |
| C5-O5-C1 | $113 \pm 3$  | $109 \pm 3$ | $113 \pm 3$   | $113 \pm 3$ | $113 \pm 3$     | $114 \pm 3$ | 113 |
| C5-C6-O6 | $108 \pm 3$  | $110 \pm 3$ | $109 \pm 3$   | $109 \pm 3$ | $114 \pm 3$     | $114 \pm 3$ | 111 |
| O5-C1-C2 | $109 \pm 3$  | $104 \pm 3$ | $109 \pm 3$   | $110 \pm 3$ | $110 \pm 3$     | $110 \pm 3$ | 110 |
| O5-C5-C6 | $107 \pm 3$  | $104 \pm 3$ | $107 \pm 3$   | $107 \pm 3$ | $107 \pm 3$     | $107 \pm 3$ | 107 |
| O5-C1-O1 | $107 \pm 3$  | $108 \pm 3$ | $105 \pm 3$   | $106 \pm 3$ | $105 \pm 3$     | $105 \pm 3$ | 109 |
| C2-C1-O1 | $108 \pm 3$  | $108 \pm 3$ | $109 \pm 3$   | $109 \pm 3$ | $109 \pm 3$     | $110 \pm 3$ | 110 |
| C1-C2-O2 | $112 \pm 3$  | $112 \pm 3$ | $110 \pm 2$   | $110 \pm 3$ | $112 \pm 3$     | $112 \pm 3$ | 109 |
| C3-C2-O2 | $107 \pm 3$  | $108 \pm 3$ | $110 \pm 2$   | $110 \pm 3$ | $111 \pm 3$     | $111 \pm 3$ | 111 |
| C2-C3-O3 | $110 \pm 3$  | $112 \pm 3$ | $112 \pm 3$   | $112 \pm 3$ | $109 \pm 3$     | $109 \pm 3$ | 108 |
| C4-C3-O3 | $107 \pm 3$  | $107 \pm 3$ | $107 \pm 3$   | $107 \pm 3$ | $111 \pm 3$     | $111 \pm 3$ | 111 |
| C3-C4-O4 | $110 \pm 3$  | $109 \pm 3$ | $110 \pm 3$   | $110 \pm 3$ | $105 \pm 3$     | $105 \pm 3$ | 110 |
| C5-C4-O4 | $110 \pm 3$  | $111 \pm 3$ | $110 \pm 3$   | $109 \pm 3$ | $113 \pm 3$     | $113 \pm 3$ | 110 |

Table 6: Angle values reported in  $^{\circ}$  as averages over 145 ns of MD in the NPT ensemble (after 5 ns equilibration). The error is the standard deviation.

|  | $\beta$ -Gal | $\beta$ -GalN | $\beta$ -GalNAc | Exp |
|--|--------------|---------------|-----------------|-----|
|--|--------------|---------------|-----------------|-----|



| Angle    | mutual pol. | no pol. | mutual pol. | no pol. | mutual pol. | no pol  |     |
|----------|-------------|---------|-------------|---------|-------------|---------|-----|
| C1-C2-C3 | 110 ± 3     | 110 ± 3 | 109 ± 2     | 109 ± 2 | 109 ± 3     | 110 ± 3 | 110 |
| C2-C3-C4 | 109 ± 3     | 110 ± 3 | 110 ± 2     | 111 ± 3 | 110 ± 3     | 110 ± 3 | 110 |
| C3-C4-C5 | 109 ± 3     | 109 ± 3 | 110 ± 3     | 110 ± 3 | 110 ± 3     | 110 ± 3 | 110 |
| C4-C5-C6 | 113 ± 3     | 113 ± 3 | 114 ± 3     | 114 ± 3 | 115 ± 3     | 115 ± 3 | 113 |
| C4-C5-O5 | 110 ± 3     | 110 ± 3 | 110 ± 3     | 110 ± 3 | 109 ± 3     | 109 ± 3 | 109 |
| C5-O5-C1 | 112 ± 3     | 113 ± 3 | 113 ± 3     | 113 ± 3 | 114 ± 3     | 114 ± 3 | 113 |
| C5-C6-O6 | 108 ± 3     | 109 ± 3 | 109 ± 3     | 109 ± 3 | 111 ± 3     | 112 ± 3 | 111 |
| O5-C1-C2 | 109 ± 3     | 110 ± 3 | 110 ± 3     | 110 ± 3 | 110 ± 3     | 110 ± 3 | 110 |
| O5-C5-C6 | 108 ± 3     | 108 ± 3 | 108 ± 3     | 108 ± 3 | 106 ± 3     | 107 ± 3 | 107 |
| O5-C1-O1 | 107 ± 3     | 107 ± 3 | 106 ± 3     | 106 ± 3 | 105 ± 3     | 105 ± 3 | 109 |
| C2-C1-O1 | 108 ± 3     | 108 ± 3 | 109 ± 3     | 109 ± 3 | 109 ± 3     | 109 ± 3 | 110 |
| C1-C2-O2 | 112 ± 3     | 112 ± 3 | 116 ± 3     | 116 ± 3 | 111 ± 3     | 112 ± 3 | 109 |
| C3-C2-O2 | 107 ± 3     | 107 ± 3 | 109 ± 2     | 109 ± 2 | 112 ± 3     | 113 ± 3 | 111 |
| C2-C3-O3 | 112 ± 3     | 112 ± 3 | 112 ± 3     | 112 ± 3 | 109 ± 3     | 109 ± 3 | 108 |
| C4-C3-O3 | 108 ± 3     | 108 ± 3 | 108 ± 3     | 108 ± 3 | 110 ± 3     | 110 ± 3 | 111 |
| C3-C4-O4 | 110 ± 3     | 110 ± 3 | 110 ± 3     | 110 ± 3 | 110 ± 3     | 110 ± 3 | 110 |
| C5-C4-O4 | 109 ± 3     | 109 ± 3 | 108 ± 3     | 108 ± 3 | 109 ± 3     | 109 ± 3 | 110 |

Table 7: Angle values reported in ° as averages over 145 ns of MD in the NPT ensemble (after 5 ns equilibration). The error is the standard deviation.

|          | $\alpha$ -Glc |         | $\alpha$ -GlcN |         | $\alpha$ -GlcNAc |         | Exp |
|----------|---------------|---------|----------------|---------|------------------|---------|-----|
| Angle    | mutual pol.   | no pol. | mutual pol.    | no pol. | mutual pol.      | no pol  |     |
| C1-C2-C3 | 111 ± 3       | 111 ± 3 | 110 ± 2        | 110 ± 2 | 110 ± 3          | 111 ± 3 | 110 |
| C2-C3-C4 | 110 ± 3       | 110 ± 3 | 111 ± 3        | 112 ± 2 | 111 ± 2          | 111 ± 3 | 110 |
| C3-C4-C5 | 109 ± 3       | 109 ± 3 | 109 ± 3        | 110 ± 3 | 112 ± 2          | 110 ± 3 | 110 |

|          |             |             |             |             |             |             |     |
|----------|-------------|-------------|-------------|-------------|-------------|-------------|-----|
| C4-C5-C6 | $112 \pm 3$ | $112 \pm 3$ | $113 \pm 3$ | $114 \pm 3$ | $113 \pm 3$ | $112 \pm 3$ | 113 |
| C4-C5-O5 | $113 \pm 3$ | $113 \pm 3$ | $112 \pm 3$ | $112 \pm 3$ | $112 \pm 3$ | $110 \pm 3$ | 109 |
| C5-O5-C1 | $115 \pm 3$ | $115 \pm 3$ | $114 \pm 3$ | $114 \pm 3$ | $117 \pm 3$ | $115 \pm 3$ | 113 |
| C5-C6-O6 | $109 \pm 3$ | $109 \pm 3$ | $108 \pm 3$ | $108 \pm 3$ | $108 \pm 3$ | $108 \pm 3$ | 111 |
| O5-C1-C2 | $112 \pm 3$ | $112 \pm 3$ | $110 \pm 3$ | $110 \pm 3$ | $110 \pm 3$ | $110 \pm 3$ | 110 |
| O5-C5-C6 | $111 \pm 3$ | $111 \pm 3$ | $113 \pm 3$ | $114 \pm 3$ | $110 \pm 3$ | $107 \pm 3$ | 107 |
| O5-C1-O1 | $110 \pm 3$ | $109 \pm 3$ | $107 \pm 4$ | $107 \pm 3$ | $110 \pm 3$ | $113 \pm 3$ | 109 |
| C2-C1-O1 | $109 \pm 3$ | $109 \pm 3$ | $110 \pm 3$ | $110 \pm 3$ | $107 \pm 3$ | $108 \pm 3$ | 110 |
| C1-C2-O2 | $111 \pm 3$ | $111 \pm 3$ | $116 \pm 3$ | $116 \pm 2$ | $114 \pm 3$ | $113 \pm 3$ | 109 |
| C3-C2-O2 | $108 \pm 3$ | $108 \pm 3$ | $108 \pm 2$ | $108 \pm 2$ | $110 \pm 3$ | $110 \pm 3$ | 111 |
| C2-C3-O3 | $112 \pm 3$ | $112 \pm 3$ | $111 \pm 3$ | $111 \pm 3$ | $111 \pm 3$ | $111 \pm 3$ | 108 |
| C4-C3-O3 | $109 \pm 3$ | $109 \pm 3$ | $111 \pm 3$ | $111 \pm 3$ | $110 \pm 3$ | $109 \pm 3$ | 111 |
| C3-C4-O4 | $114 \pm 3$ | $114 \pm 3$ | $114 \pm 3$ | $114 \pm 3$ | $112 \pm 3$ | $111 \pm 3$ | 110 |
| C5-C4-O4 | $111 \pm 3$ | $111 \pm 3$ | $110 \pm 3$ | $110 \pm 3$ | $110 \pm 3$ | $112 \pm 3$ | 110 |

Table 8: Angle values reported in  $^\circ$  as averages over 145 ns of MD in the NPT ensemble (after 5 ns equilibration). The error is the standard deviation.

| Angle    | $\alpha$ -Gal |             | $\alpha$ -GalN |             | $\alpha$ -GalNAc |             | Exp |
|----------|---------------|-------------|----------------|-------------|------------------|-------------|-----|
|          | mutual pol.   | no pol.     | mutual pol.    | no pol.     | mutual pol.      | no pol.     |     |
| C1-C2-C3 | $110 \pm 3$   | $110 \pm 3$ | $111 \pm 2$    | $111 \pm 2$ | $110 \pm 3$      | $111 \pm 3$ | 110 |
| C2-C3-C4 | $109 \pm 3$   | $110 \pm 3$ | $110 \pm 3$    | $110 \pm 3$ | $110 \pm 3$      | $110 \pm 3$ | 110 |
| C3-C4-C5 | $109 \pm 3$   | $109 \pm 3$ | $110 \pm 3$    | $109 \pm 3$ | $110 \pm 3$      | $110 \pm 3$ | 110 |
| C4-C5-C6 | $113 \pm 3$   | $113 \pm 3$ | $112 \pm 3$    | $112 \pm 3$ | $115 \pm 3$      | $115 \pm 3$ | 113 |
| C4-C5-O5 | $111 \pm 3$   | $111 \pm 3$ | $112 \pm 3$    | $111 \pm 3$ | $110 \pm 3$      | $110 \pm 3$ | 109 |
| C5-O5-C1 | $114 \pm 3$   | $114 \pm 3$ | $113 \pm 3$    | $113 \pm 3$ | $115 \pm 3$      | $115 \pm 3$ | 113 |
| C5-C6-O6 | $108 \pm 3$   | $109 \pm 3$ | $107 \pm 3$    | $108 \pm 3$ | $111 \pm 3$      | $111 \pm 3$ | 111 |
| O5-C1-C2 | $110 \pm 3$   | $110 \pm 3$ | $112 \pm 3$    | $112 \pm 3$ | $111 \pm 3$      | $111 \pm 3$ | 110 |

|          |         |         |         |         |         |         |     |
|----------|---------|---------|---------|---------|---------|---------|-----|
| O5-C5-C6 | 108 ± 3 | 108 ± 3 | 110 ± 3 | 110 ± 3 | 105 ± 3 | 106 ± 3 | 107 |
| O5-C1-O1 | 113 ± 3 | 113 ± 3 | 109 ± 3 | 108 ± 3 | 112 ± 3 | 112 ± 3 | 109 |
| C2-C1-O1 | 109 ± 3 | 109 ± 3 | 112 ± 3 | 112 ± 3 | 109 ± 3 | 109 ± 3 | 110 |
| C1-C2-O2 | 114 ± 3 | 114 ± 3 | 111 ± 2 | 111 ± 2 | 113 ± 3 | 113 ± 3 | 109 |
| C3-C2-O2 | 107 ± 3 | 107 ± 3 | 109 ± 2 | 109 ± 2 | 110 ± 3 | 110 ± 3 | 111 |
| C2-C3-O3 | 111 ± 3 | 111 ± 3 | 111 ± 3 | 112 ± 3 | 110 ± 3 | 110 ± 3 | 108 |
| C4-C3-O3 | 107 ± 3 | 107 ± 3 | 110 ± 3 | 107 ± 3 | 108 ± 3 | 108 ± 3 | 111 |
| C3-C4-O4 | 109 ± 3 | 110 ± 3 | 107 ± 3 | 111 ± 3 | 110 ± 3 | 110 ± 3 | 110 |
| C5-C4-O4 | 109 ± 3 | 109 ± 3 | 114 ± 3 | 114 ± 3 | 110 ± 3 | 109 ± 3 | 110 |

Table 9: Torsion values reported in ° as averages over 145 ns of MD in the NPT ensemble (after 5 ns equilibration). The error is the standard deviation.

| Torsion     | $\beta$ -Glc |         | $\beta$ -GlcN |         | $\beta$ -GlcNAc |         | Exp |
|-------------|--------------|---------|---------------|---------|-----------------|---------|-----|
|             | mutual pol.  | no pol. | mutual pol.   | no pol. | mutual pol.     | no pol. |     |
| C1-C2-C3-C4 | -55± 6       | -50± 6  | -55 ± 5       | -55± 6  | -54± 6          | -52± 6  | -54 |
| C2-C3-C4-C5 | 53 ± 6       | 50 ± 6  | 54 ± 5        | 53 ± 6  | 54 ± 6          | 53 ± 6  | 55  |
| C3-C4-C5-O5 | -55 ± 6      | -58± 6  | -55± 4        | -55± 6  | -55± 6          | -56± 6  | -57 |
| C4-C5-O5-C1 | 62 ± 5       | 75 ± 6  | 62 ± 5        | 62 ± 6  | 61 ± 6          | 62 ± 6  | 62  |
| C5-O5-C1-C2 | -65 ± 6      | -77± 6  | -65 ± 5       | -64± 6  | -63± 5          | -62± 6  | -62 |
| O5-C1-C2-C3 | 59 ± 6       | 61 ± 6  | 58 ± 5        | 57 ± 6  | 57 ± 6          | 55 ± 6  | 57  |
| O1-C1-O5-C5 | 178± 6       | 168± 6  | 178± 6        | 178± 7  | 180± 7          | 180± 7  | N/A |
| O2-C2-C1-O5 | 178± 6       | 180± 6  | 179± 5        | 178± 7  | 180± 7          | 180± 7  | N/A |
| O3-C3-C2-C1 | -174± 6      | -170± 6 | -175± 6       | -174± 6 | -177± 6         | -175± 6 | N/A |
| O4-C4-C3-C2 | 174± 6       | 170± 6  | 174± 6        | 174± 6  | 176± 6          | 176± 6  | N/A |

Table 10: Torsion values reported in ° as averages over 145 ns of MD in the NPT ensemble (after 5 ns equilibration). The error is the standard deviation.

| Torsion     | $\beta$ -Gal |              | $\beta$ -GalN |              | $\beta$ -GalNAc |              | Exp |
|-------------|--------------|--------------|---------------|--------------|-----------------|--------------|-----|
|             | mutual pol.  | no pol.      | mutual pol.   | no pol.      | mutual pol.     | no pol.      |     |
| C1-C2-C3-C4 | $-55 \pm 5$  | $-54 \pm 5$  | $-53 \pm 5$   | $-52 \pm 5$  | $-53 \pm 5$     | $-52 \pm 6$  | -54 |
| C2-C3-C4-C5 | $53 \pm 5$   | $53 \pm 5$   | $54 \pm 5$    | $53 \pm 5$   | $54 \pm 5$      | $54 \pm 5$   | 55  |
| C3-C4-C5-O5 | $-57 \pm 5$  | $-57 \pm 5$  | $-57 \pm 5$   | $-57 \pm 5$  | $-57 \pm 5$     | $-57 \pm 5$  | -57 |
| C4-C5-O5-C1 | $63 \pm 6$   | $63 \pm 6$   | $63 \pm 6$    | $63 \pm 6$   | $62 \pm 6$      | $62 \pm 5$   | 62  |
| C5-O5-C1-C2 | $-64 \pm 6$  | $-63 \pm 6$  | $-62 \pm 6$   | $-61 \pm 6$  | $-62 \pm 5$     | $-61 \pm 6$  | -62 |
| O5-C1-C2-C3 | $59 \pm 6$   | $57 \pm 6$   | $56 \pm 6$    | $55 \pm 6$   | $56 \pm 6$      | $54 \pm 6$   | 57  |
| O1-C1-O5-C5 | $179 \pm 6$  | $180 \pm 6$  | $180 \pm 6$   | $-179 \pm 6$ | $-179 \pm 6$    | $-179 \pm 6$ | N/A |
| O2-C2-C1-O5 | $178 \pm 6$  | $176 \pm 6$  | $180 \pm 6$   | $178 \pm 6$  | $180 \pm 6$     | $-179 \pm 6$ | N/A |
| O3-C3-C2-C1 | $-175 \pm 6$ | $-174 \pm 6$ | $-173 \pm 6$  | $-172 \pm 6$ | $-174 \pm 6$    | $-173 \pm 6$ | N/A |
| O4-C4-C3-C2 | $-66 \pm 6$  | $-66 \pm 6$  | $-66 \pm 6$   | $-66 \pm 6$  | $-66 \pm 6$     | $-66 \pm 6$  | N/A |

Table 11: Torsion values reported in  $^\circ$  as averages over 145 ns of MD in the NPT ensemble (after 5 ns equilibration). The error is the standard deviation.

| Torsion     | $\alpha$ -Glc |               | $\alpha$ -GlcN |              | $\alpha$ -GlcNAc |              | Exp |
|-------------|---------------|---------------|----------------|--------------|------------------|--------------|-----|
|             | mutual pol.   | no pol.       | mutual pol.    | no pol.      | mutual pol.      | no pol.      |     |
| C1-C2-C3-C4 | $-57 \pm 9$   | $-52 \pm 13$  | $13 \pm 52$    | $52 \pm 13$  | $55 \pm 5$       | $-52 \pm 6$  | -54 |
| C2-C3-C4-C5 | $56 \pm 8$    | $57 \pm 7$    | $-8 \pm 52$    | $-46 \pm 17$ | $-49 \pm 5$      | $52 \pm 6$   | 55  |
| C3-C4-C5-O5 | $-49 \pm 15$  | $-48 \pm 14$  | $11 \pm 48$    | $47 \pm 13$  | $45 \pm 6$       | $-54 \pm 6$  | -57 |
| C4-C5-O5-C1 | $43 \pm 29$   | $35 \pm 36$   | $-21 \pm 51$   | $-57 \pm 7$  | $-51 \pm 6$      | $59 \pm 7$   | 62  |
| C5-O5-C1-C2 | $-42 \pm 33$  | $-28 \pm 47$  | $27 \pm 54$    | $61 \pm 6$   | $58 \pm 6$       | $-59 \pm 6$  | -62 |
| O5-C1-C2-C3 | $49 \pm 22$   | $37 \pm 34$   | $-22 \pm 51$   | $-58 \pm 7$  | $-58 \pm 5$      | $54 \pm 6$   | 57  |
| O1-C1-O5-C5 | $80 \pm 33$   | $94 \pm 46$   | $147 \pm 51$   | $-179 \pm 6$ | $176 \pm 6$      | $62 \pm 7$   | N/A |
| O2-C2-C1-O5 | $170 \pm 22$  | $158 \pm 35$  | $102 \pm 51$   | $66 \pm 7$   | $66 \pm 6$       | $178 \pm 6$  | N/A |
| O3-C3-C2-C1 | $-178 \pm 9$  | $-173 \pm 13$ | $-111 \pm 51$  | $-73 \pm 13$ | $-68 \pm 6$      | $-174 \pm 6$ | N/A |

|             |         |          |          |         |        |        |     |
|-------------|---------|----------|----------|---------|--------|--------|-----|
| O4-C4-C3-C2 | -179± 8 | -179 ± 7 | 116 ± 53 | 77 ± 17 | 75 ± 6 | 176± 7 | N/A |
|-------------|---------|----------|----------|---------|--------|--------|-----|

Table 12: Torsion values reported in  $^{\circ}$  as averages over 145 ns of MD in the NPT ensemble (after 5 ns equilibration). The error is the standard deviation.

| Torsion     | $\alpha$ -Gal |          | $\alpha$ -GalN |          | $\alpha$ -GalNAc |          | Exp |
|-------------|---------------|----------|----------------|----------|------------------|----------|-----|
|             | mutual pol.   | no pol.  | mutual pol.    | no pol.  | mutual pol.      | no pol.  |     |
| C1-C2-C3-C4 | -55 ± 5       | -54 ± 5  | -52 ± 10       | -54 ± 5  | -55 ± 5          | -54 ± 5  | -54 |
| C2-C3-C4-C5 | 55 ± 5        | 54 ± 5   | 55 ± 6         | 55 ± 5   | 55 ± 5           | 55 ± 5   | 55  |
| C3-C4-C5-O5 | -56 ± 6       | -56 ± 5  | -56 ± 8        | -57 ± 6  | -55 ± 6          | -56 ± 5  | -57 |
| C4-C5-O5-C1 | 59 ± 6        | 60 ± 6   | 54 ± 15        | 57 ± 6   | 57 ± 6           | 58 ± 6   | 62  |
| C5-O5-C1-C2 | -57 ± 7       | -58 ± 6  | -50 ± 20       | -55 ± 6  | -56 ± 6          | -57 ± 6  | -62 |
| O5-C1-C2-C3 | 55 ± 6        | 54 ± 6   | 49 ± 18        | 53 ± 6   | 55 ± 6           | 54 ± 6   | 57  |
| O1-C1-O5-C5 | 65 ± 8        | 64 ± 7   | 71 ± 9         | 68 ± 7   | 65 ± 7           | 65 ± 7   | N/A |
| O2-C2-C1-O5 | 175 ± 7       | 175 ± 6  | 172 ± 6        | 174 ± 6  | 178 ± 6          | 177 ± 6  | N/A |
| O3-C3-C2-C1 | -173 ± 6      | -172 ± 6 | -173 ± 6       | -177 ± 6 | -174 ± 6         | -173 ± 6 | N/A |
| O4-C4-C3-C2 | -65 ± 6       | -65 ± 6  | -66 ± 6        | -69 ± 6  | -65 ± 6          | -65 ± 6  | N/A |

### Radial distribution function for $\alpha$ anomers

Table 13: First peak position ( $r_0$ ), first minimum position ( $r_{\min}$ ) and coordination number (CN) for hydroxyl-water radial distribution function of  $\alpha$ -Glc with and without mutual polarization.

| Oxygen         | Mutual pol. |                |      | No pol.   |                |      |
|----------------|-------------|----------------|------|-----------|----------------|------|
|                | $r_0$ (Å)   | $r_{\min}$ (Å) | CN   | $r_0$ (Å) | $r_{\min}$ (Å) | CN   |
| O <sub>1</sub> | 2.85        | 3.65           | 4.07 | 3.05      | 3.95           | 4.41 |
| O <sub>2</sub> | 2.85        | 3.35           | 3.33 | 3.05      | 4.05           | 4.84 |
| O <sub>3</sub> | 2.85        | 3.65           | 4.42 | 3.05      | 3.95           | 4.63 |
| O <sub>4</sub> | 2.85        | 3.45           | 3.39 | 3.05      | 3.85           | 3.93 |
| Average        | 2.85        | 3.45           | 3.51 | 3.05      | 4.05           | 4.82 |
| O <sub>6</sub> | 2.85        | 3.35           | 3.33 | 3.05      | 3.95           | 4.73 |

### Mean square displacement of $\beta$ -Glc center-of-mass as a function of concentration

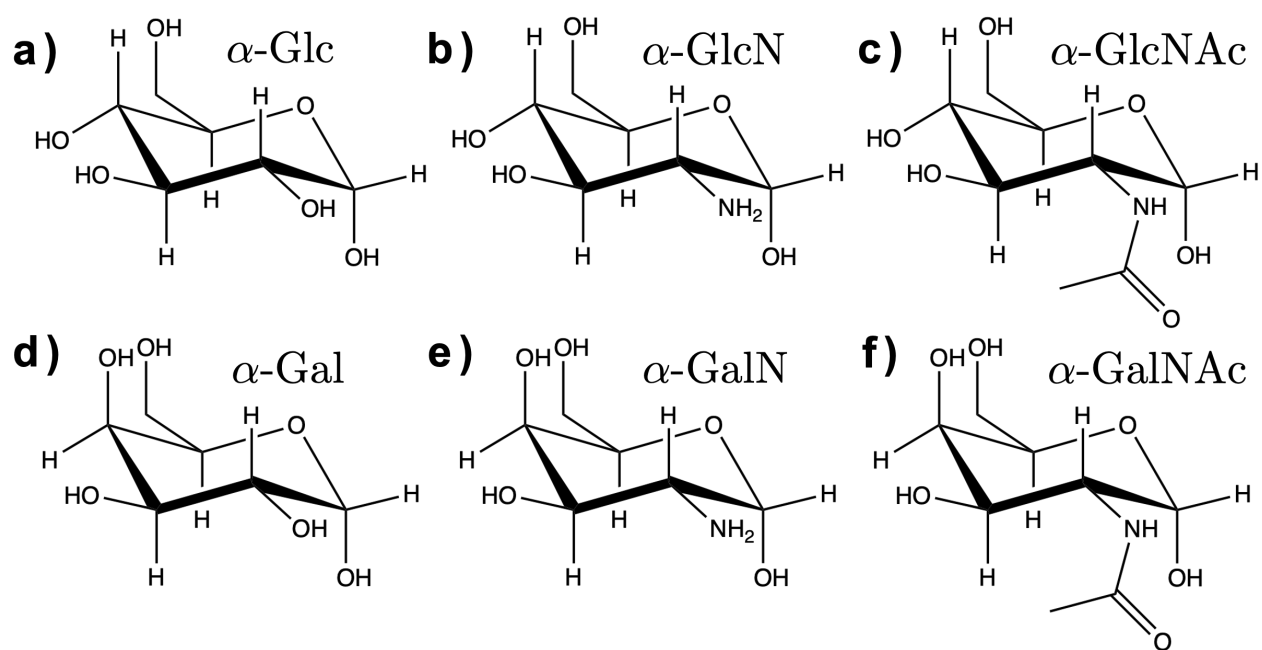

Figure S1: Chemical structure of the  $\alpha$  anomers of the six monosaccharides studied here. a) Glc, b) GlcN, c) GlcNAc, d) Gal, e) GalN, f) GalNAc.

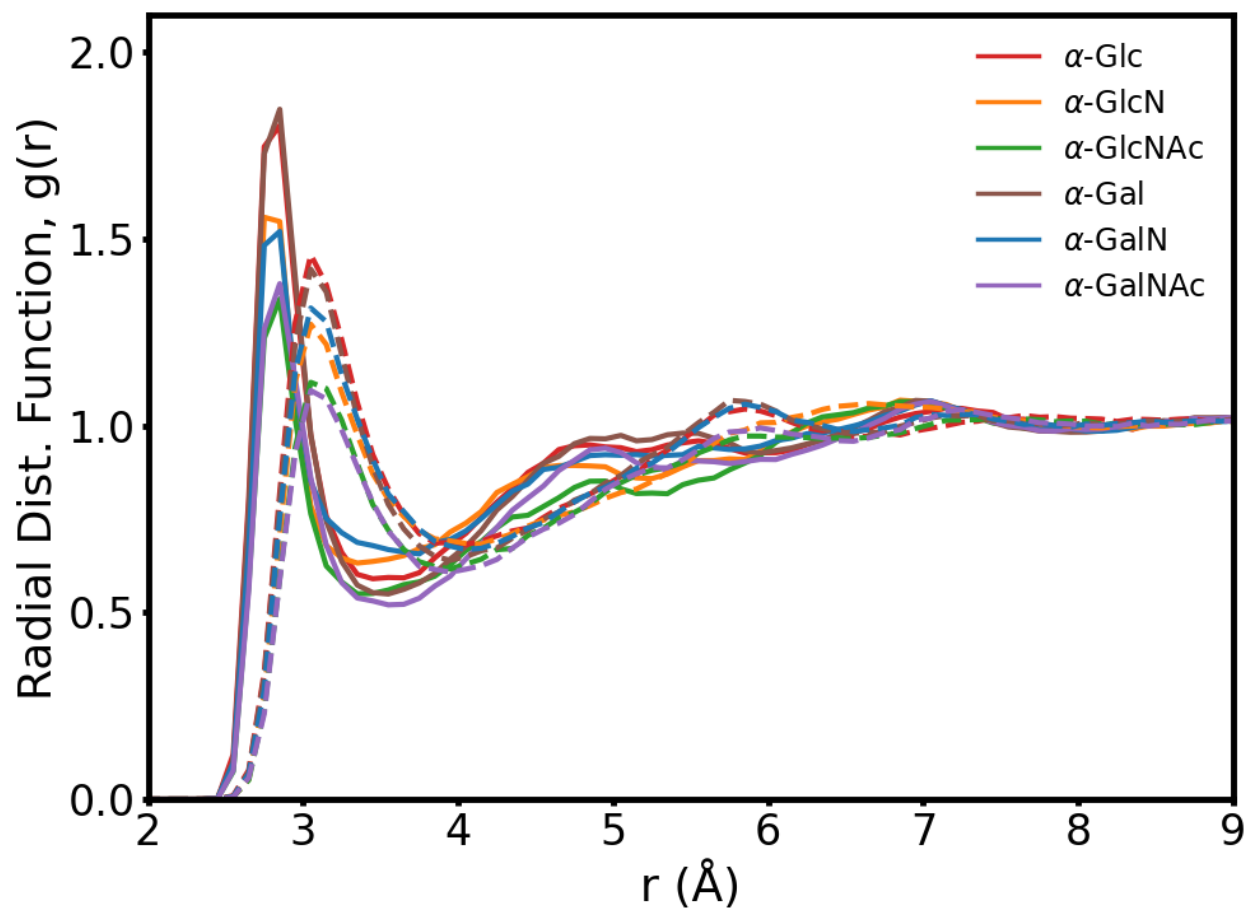

Figure S2: Carbohydrate-water radial distribution function for the six  $\alpha$  anomers, with (solid lines) and without (dotted lines) mutual polarization. Each curve is an average of the  $O_1 - O_w$ ,  $O_2/N_2 - O_w$ ,  $O_3 - O_w$  and  $O_4 - O_w$  distribution functions, where  $O_w$  is the water oxygen.

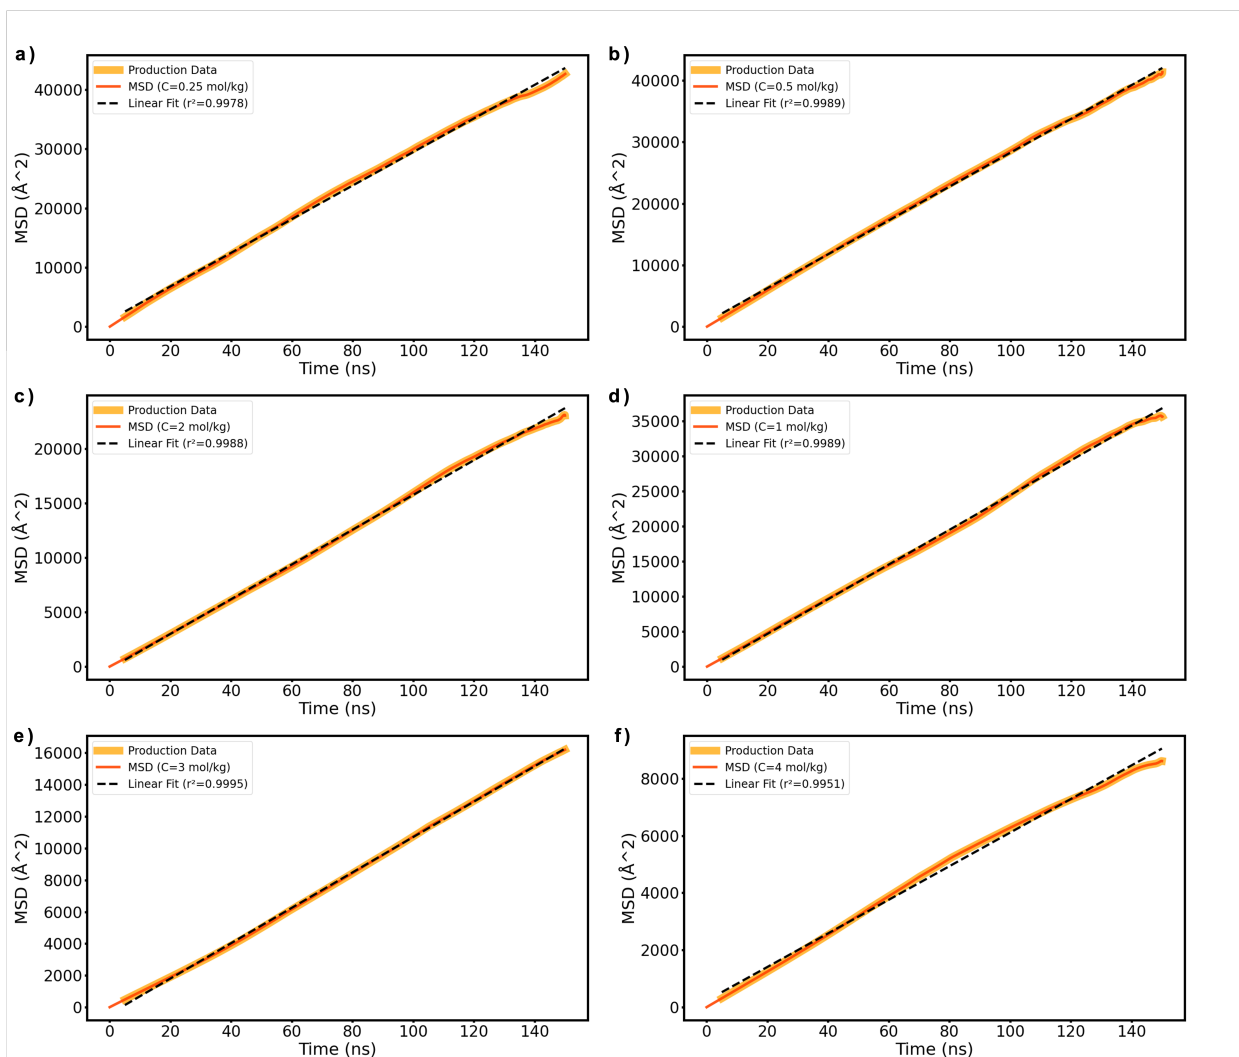

Figure S3: Mean square displacement of  $\beta$ -Glc center-of-mass as a function of MD time and linear fit a)  $c=0.25$  mol/kg (29  $\beta$ -Glc molecules), b)  $c=0.5$  mol/kg (56  $\beta$ -Glc molecules), c)  $c=1$  mol/kg (105  $\beta$ -Glc molecules), d)  $c=2$  mol/kg (188  $\beta$ -Glc molecules), e)  $c=3$  mol/kg (255  $\beta$ -Glc molecules), f)  $c=4$  mol/kg (305  $\beta$ -Glc molecules).



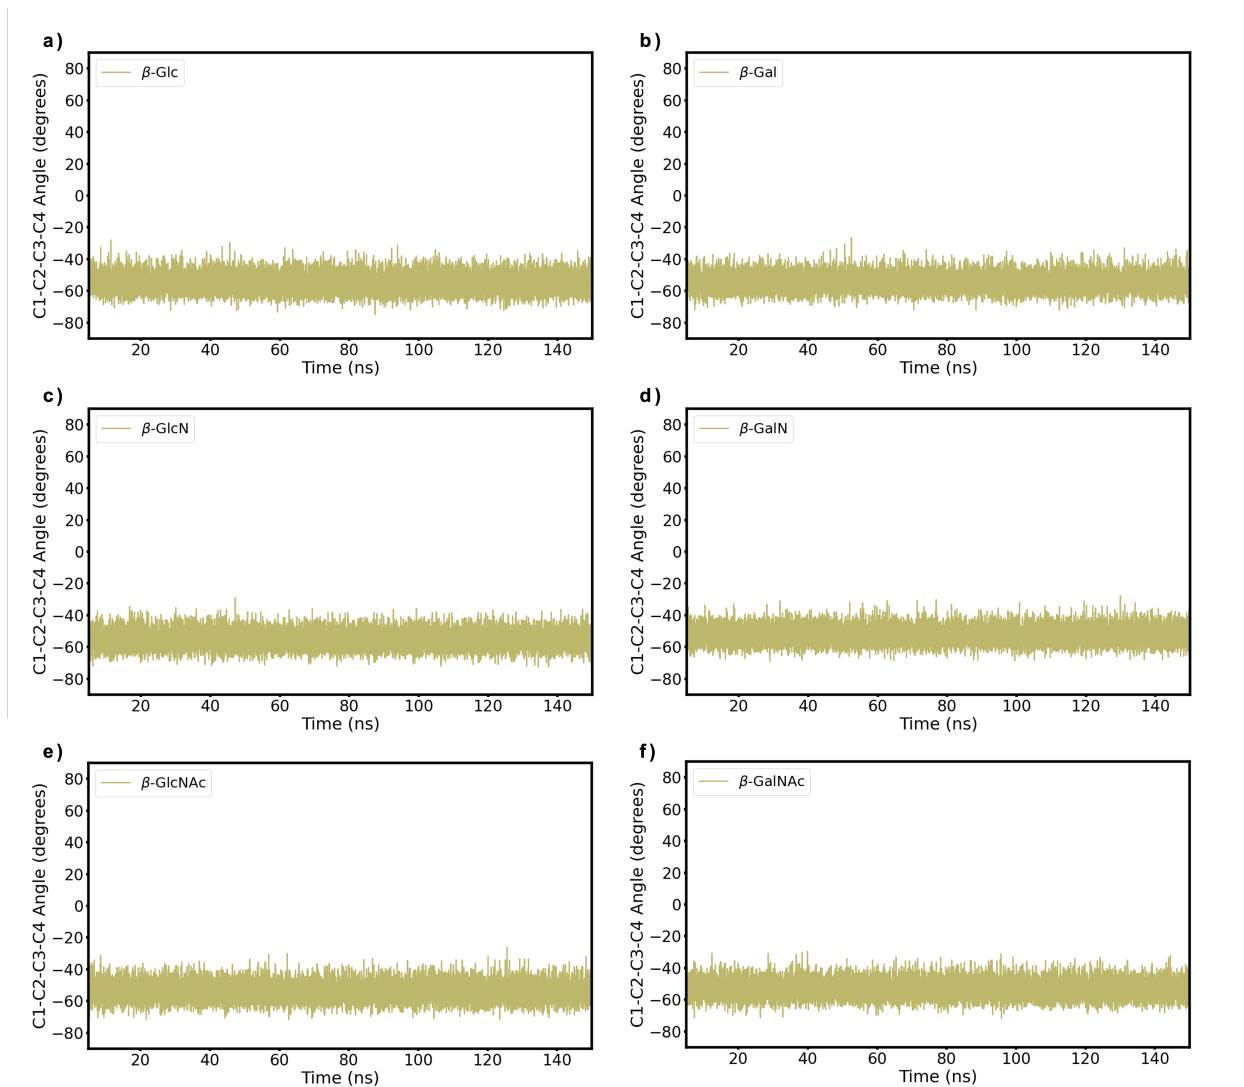

Figure S4: Time evolution of the torsion angle  $C_1 - C_2 - C_3 - C_4$  in  $\beta$ - anomers during 145 ns production MD with AMOEBA (mutual polarization,  $\beta$  parameters).  $C_1 - C_2 - C_3 - C_4$  is  $-55^\circ$  when in chair conformation. a)  $\beta$ -Glc, b)  $\beta$ -GlcN, c)  $\beta$ -GlcNAc, d)  $\beta$ -Gal, e)  $\beta$ -GalN, f)  $\beta$ -GalNAc.

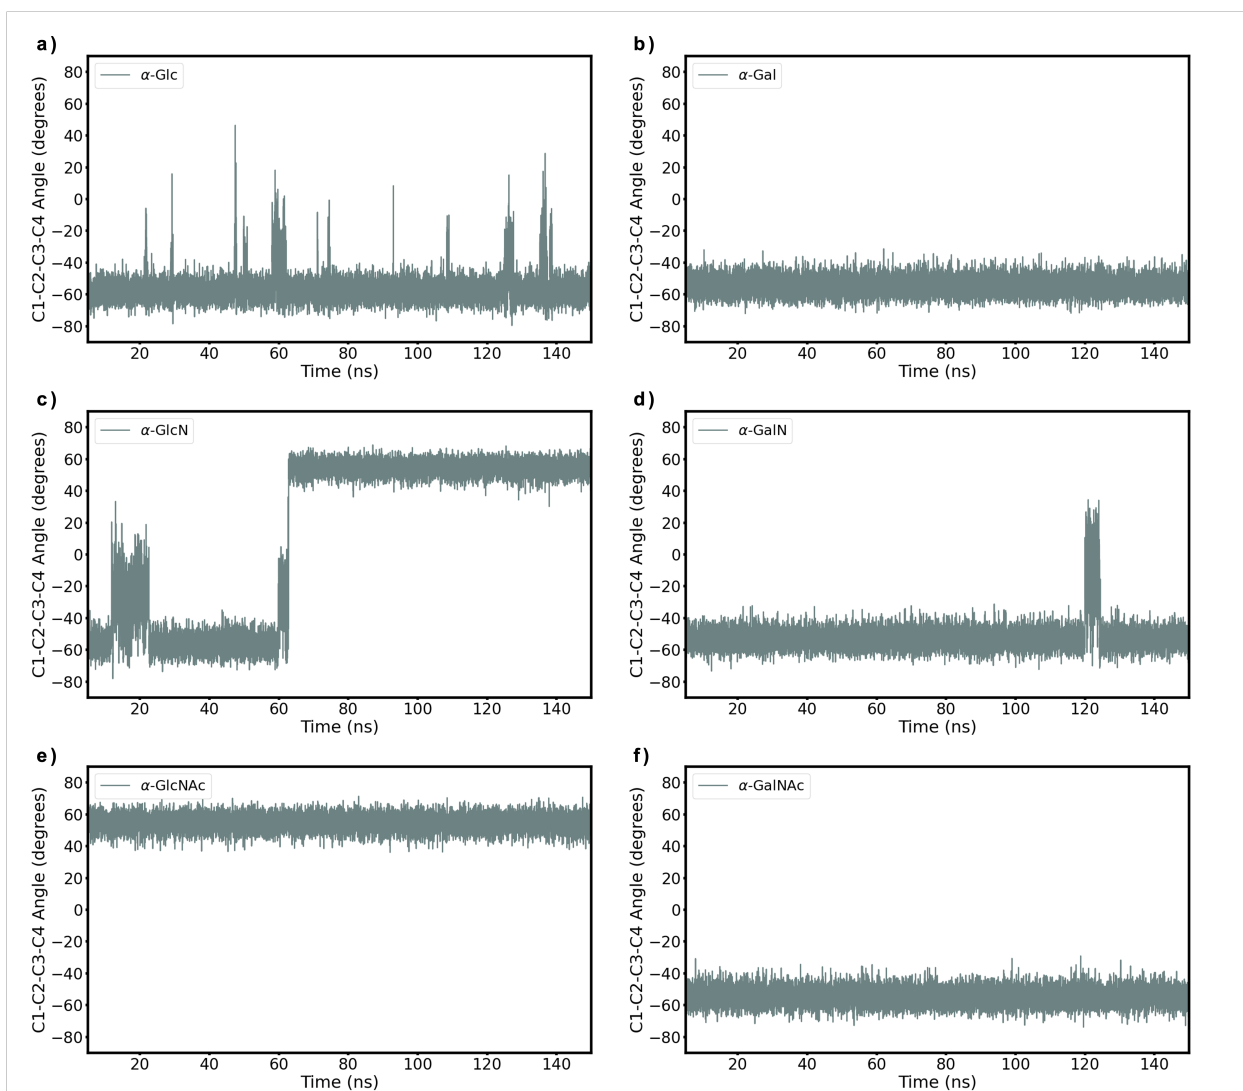

Figure S5: Time evolution of the torsion angle  $C_1 - C_2 - C_3 - C_4$  in  $\alpha$ - anomers during 145 ns production MD with AMOEBA (mutual polarization,  $\alpha$  parameters).  $C_1 - C_2 - C_3 - C_4$  is  $-55^\circ$  when in chair conformation. a)  $\alpha$ -Glc, b)  $\alpha$ -GlcN, c)  $\alpha$ -GlcNAc, d)  $\alpha$ -Gal, e)  $\alpha$ -GalN, f)  $\alpha$ -GalNAc. Overall,  $\alpha$ -Glc,  $\alpha$ -GlcN,  $\alpha$ -GlcNAc,  $\alpha$ -Gal,  $\alpha$ -GalN and  $\alpha$ -GalNAc spends 2.9, 7.4, 0.09, 0.07, 2.6 and 0.05% of the time, respectively, in a conformation other than chair.

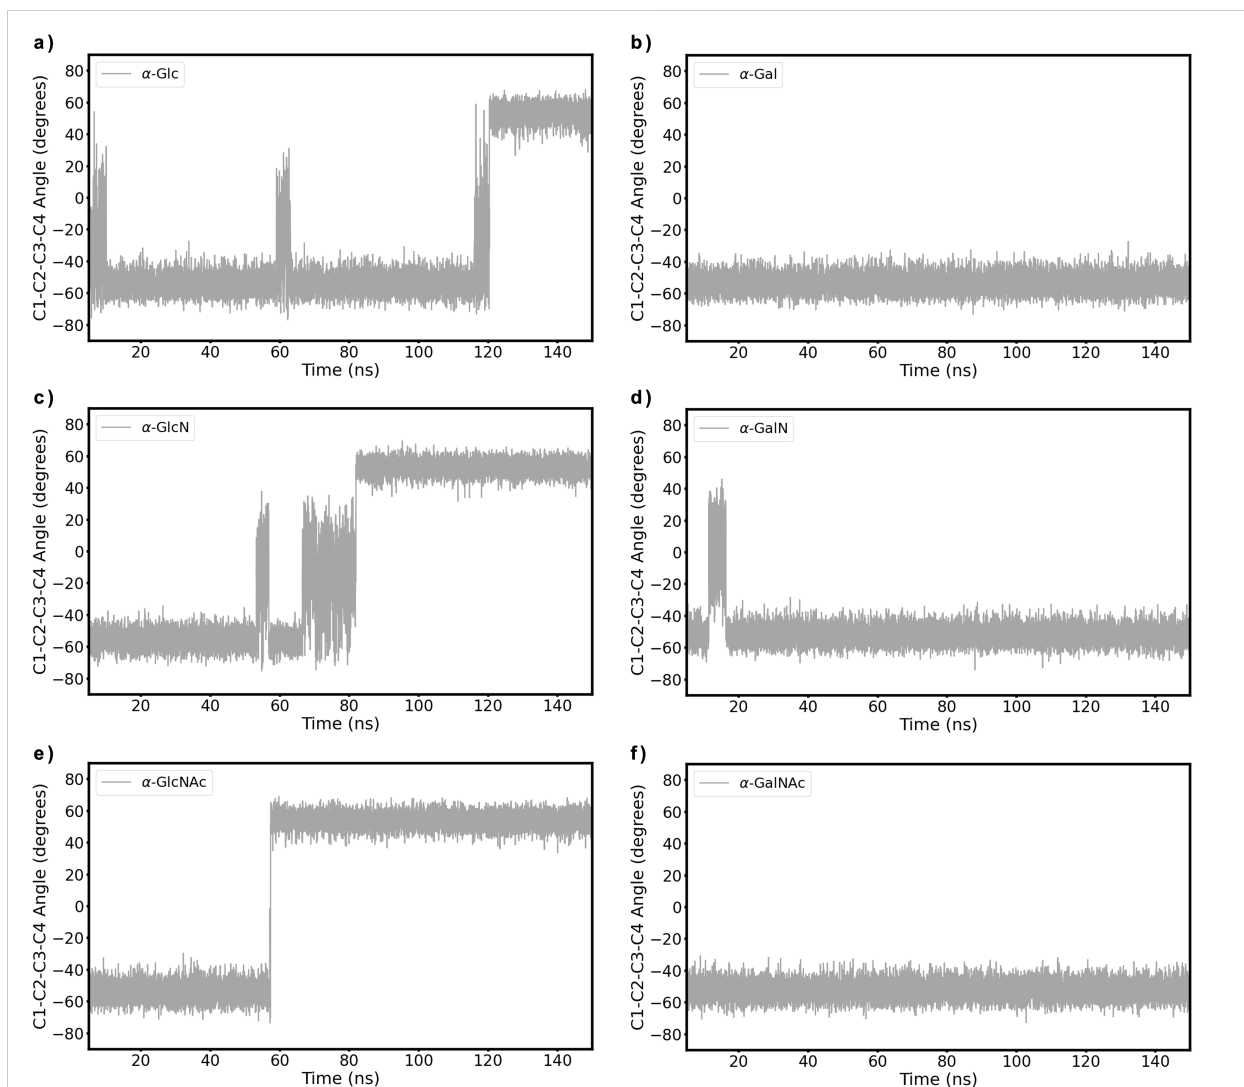

Figure S6: Time evolution of the torsion angle  $C_1 - C_2 - C_3 - C_4$  in  $\alpha$ - anomers during 145 ns production MD with AMOEBA (mutual polarization,  $\beta$  parameters).  $C_1 - C_2 - C_3 - C_4$  is  $-55^\circ$  when in chair conformation. a)  $\alpha$ -Glc, b)  $\alpha$ -GlcN, c)  $\alpha$ -GlcNAc, d)  $\alpha$ -Gal, e)  $\alpha$ -GalN, f)  $\alpha$ -GalNAc. Overall,  $\alpha$ -Glc,  $\alpha$ -GlcN,  $\alpha$ -GlcNAc,  $\alpha$ -Gal,  $\alpha$ -GalN and  $\alpha$ -GalNAc spends 7.6, 10.9, 0.1, 0.1, 4.1 and 0.2% of the time, respectively, in a conformation other than chair.

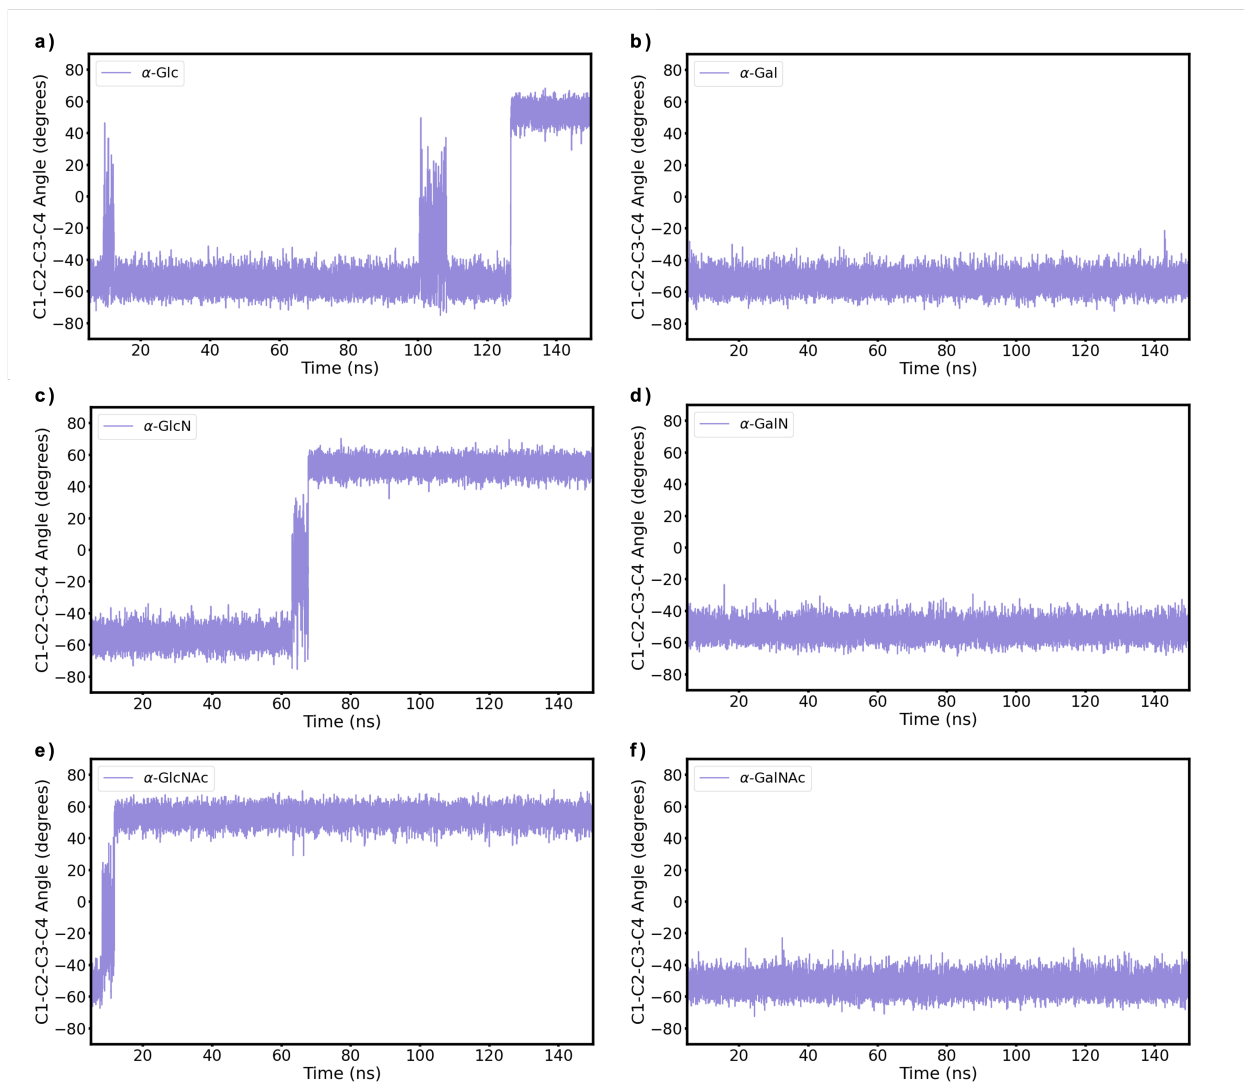

Figure S7: Time evolution of the torsion angle  $C_1 - C_2 - C_3 - C_4$  in  $\alpha$ - anomers during 145 ns production MD with AMOEBA (mutual polarization,  $\alpha$  parameters, no energy minimization prior to MD).  $C_1 - C_2 - C_3 - C_4$  is  $-55^\circ$  when in chair conformation. a)  $\alpha$ -Glc, b)  $\alpha$ -GlcN, c)  $\alpha$ -GlcNAc, d)  $\alpha$ -Gal, e)  $\alpha$ -GalN, f)  $\alpha$ -GalNAc. Overall,  $\alpha$ -Glc,  $\alpha$ -GlcN,  $\alpha$ -GlcNAc,  $\alpha$ -Gal,  $\alpha$ -GalN and  $\alpha$ -GalNAc spends 4.9, 2.7, 2.4, 0.1, 0.2 and 0.2% of the time, respectively, in a conformation other than chair.

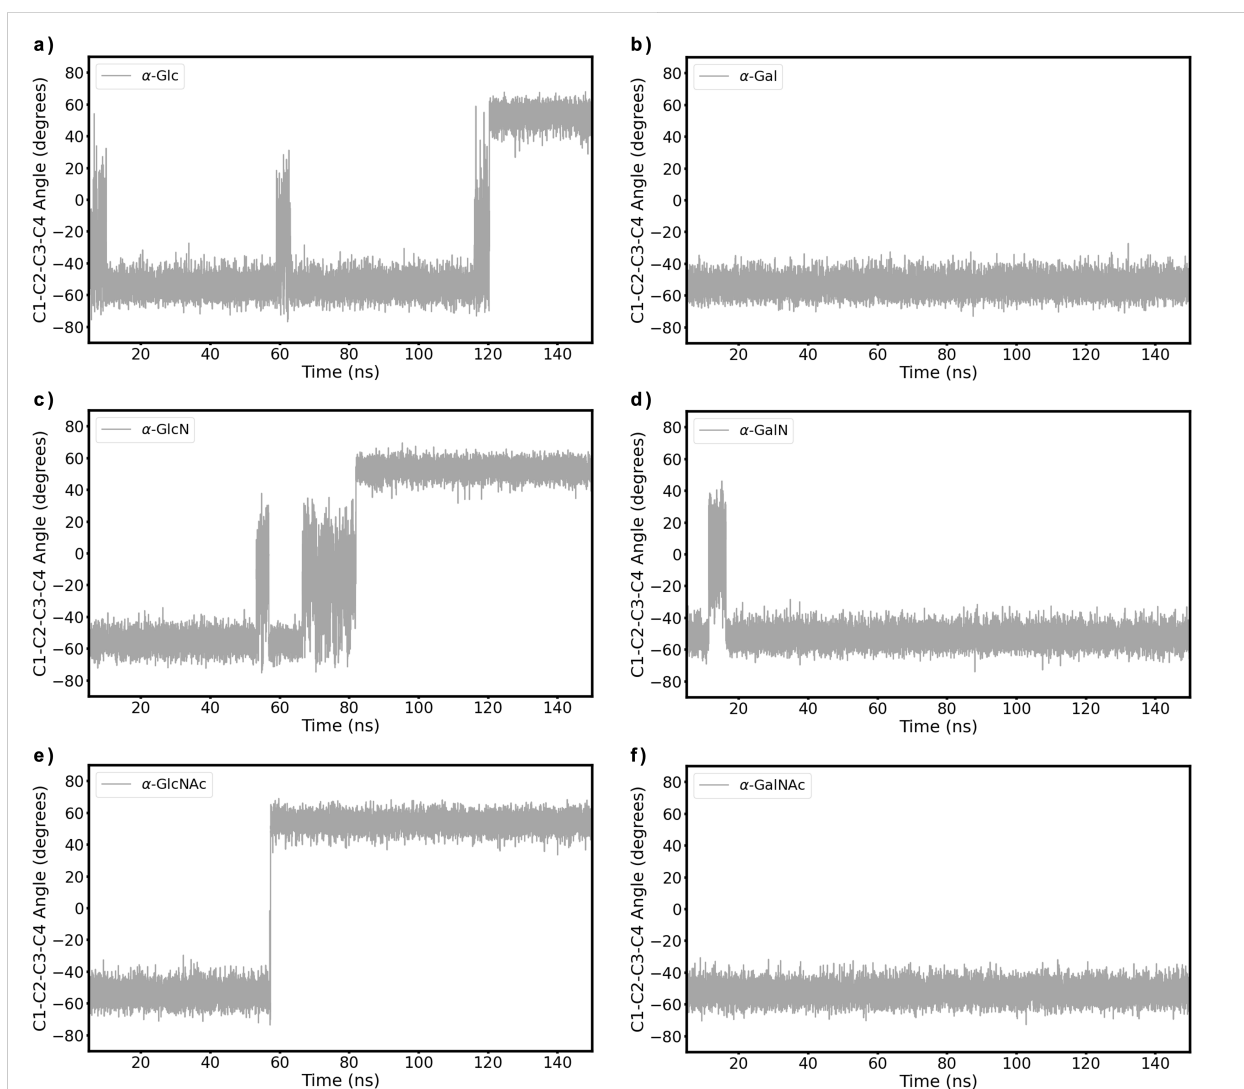

Figure S8: Time evolution of the torsion angle  $C_1 - C_2 - C_3 - C_4$  in  $\alpha$ - anomers during 145 ns production MD with AMOEBA (mutual polarization,  $\beta$  parameters).  $C_1 - C_2 - C_3 - C_4$  is  $-55^\circ$  when in chair conformation. a)  $\alpha$ -Glc, b)  $\alpha$ -GlcN, c)  $\alpha$ -GlcNac, d)  $\alpha$ -Gal, e)  $\alpha$ -GalN, f)  $\alpha$ -GalNac. Overall,  $\alpha$ -Glc,  $\alpha$ -GlcN,  $\alpha$ -GlcNac,  $\alpha$ -Gal,  $\alpha$ -GalN and  $\alpha$ -GalNac spends 7.6, 10.9, 0.1, 0.1, 4.1 and 0.2% of the time, respectively, in a conformation other than chair.

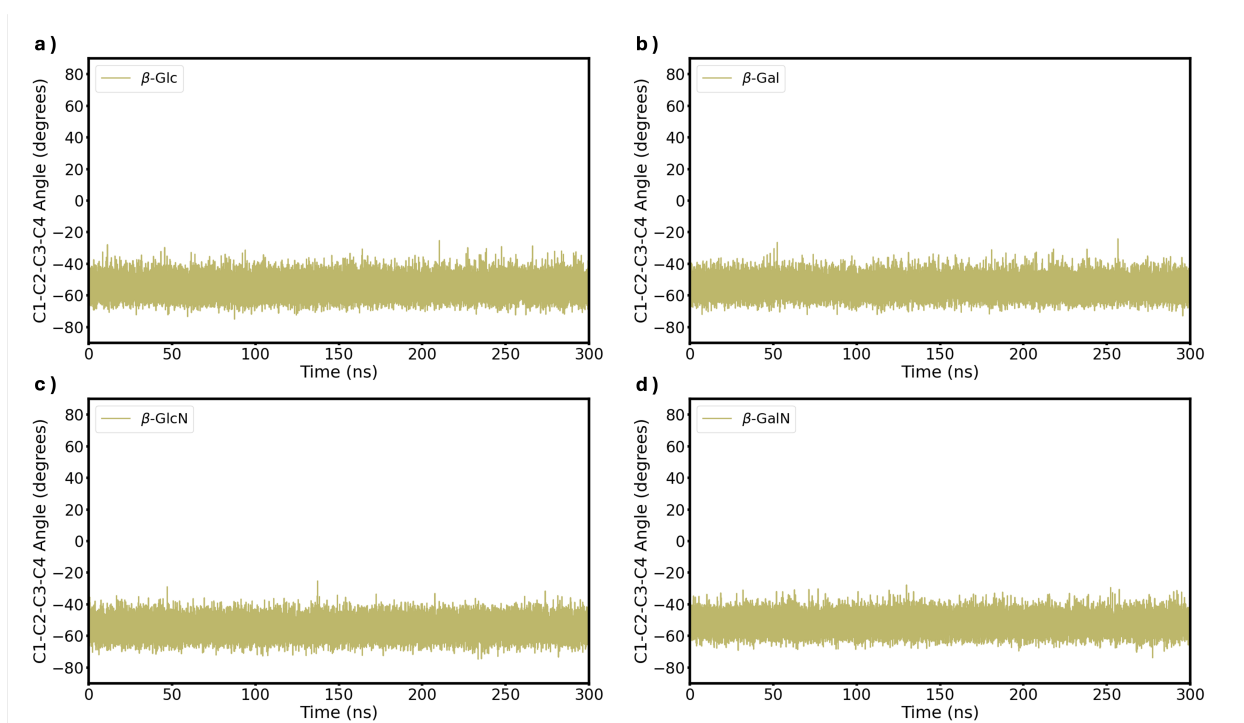

Figure S9: Time evolution of the torsion angle  $C_1 - C_2 - C_3 - C_4$  in  $\beta$ -Glc, GlcN, Gal, and GalN during 300 ns (extension of the previous 145 ns presented in Figure S4), first replicate.  $C_1 - C_2 - C_3 - C_4$  is  $-55^\circ$  when in chair conformation. a)  $\beta$ -Glc, b)  $\beta$ -GlcN, c)  $\beta$ -GlcNAc, d)  $\beta$ -Gal.

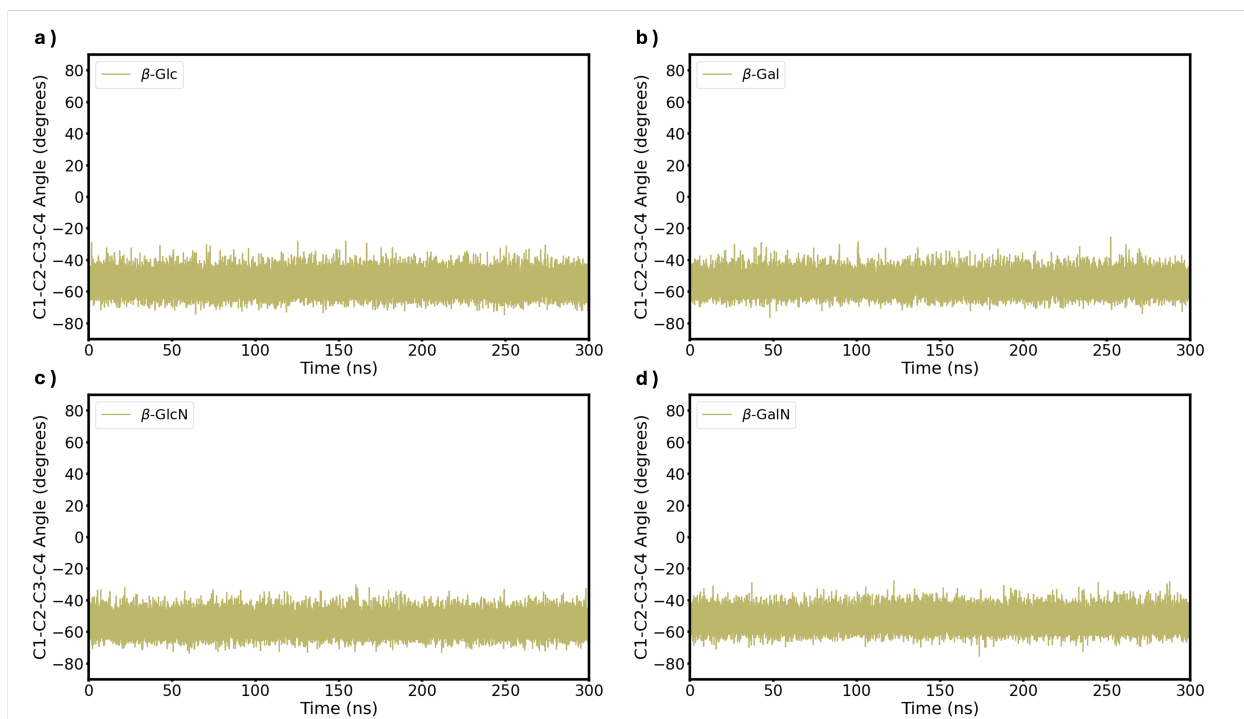

Figure S10: Time evolution of the torsion angle  $C_1 - C_2 - C_3 - C_4$  in  $\beta$ -Glc, GlcN, Gal, and GalN during 300 ns, second replicate.  $C_1 - C_2 - C_3 - C_4$  is  $-55^\circ$  when in chair conformation. a)  $\beta$ -Glc, b)  $\beta$ -GlcN, c)  $\beta$ -GlcNAc, d)  $\beta$ -Gal.

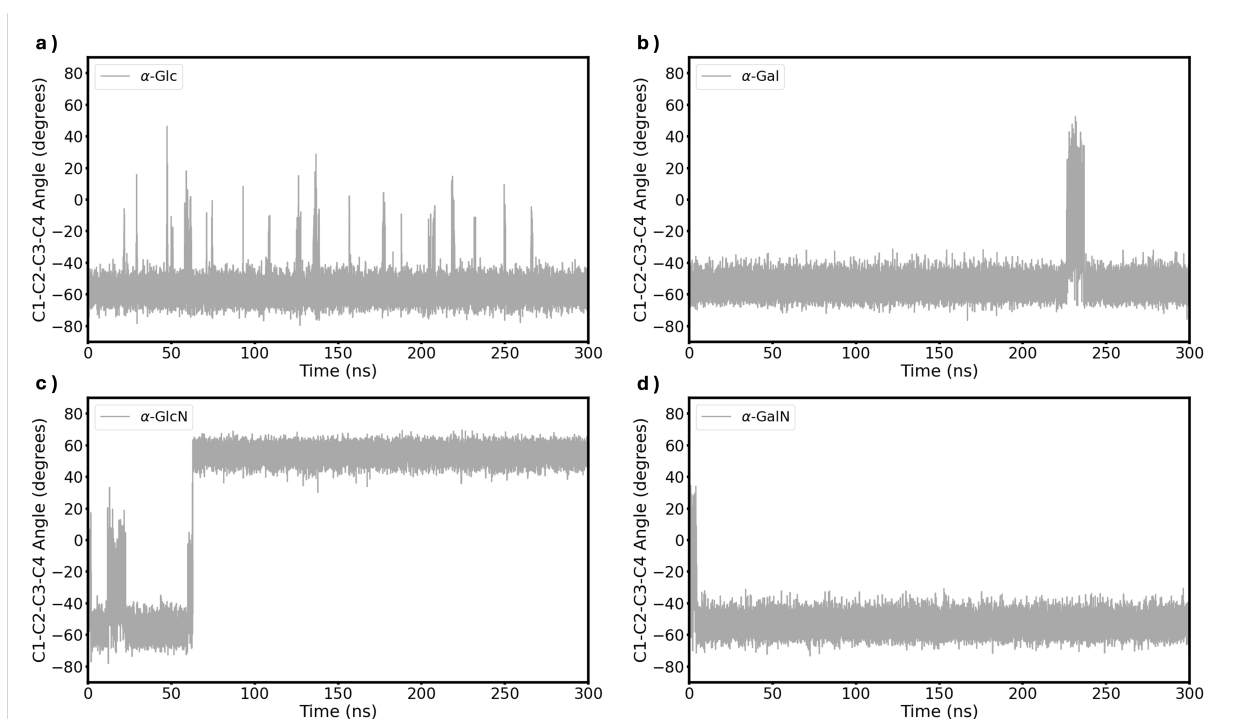

Figure S11: Time evolution of the torsion angle  $C_1 - C_2 - C_3 - C_4$  in  $\alpha$ -Glc, GlcN, Gal, and GalN during 300 ns (extension of the previous 145 ns presented in Figure S5), first replicate.  $C_1 - C_2 - C_3 - C_4$  is  $-55^\circ$  when in chair conformation. a)  $\alpha$ -Glc, b)  $\alpha$ -GlcN, c)  $\alpha$ -GlcNAc, d)  $\alpha$ -Gal. Overall,  $\alpha$ -Glc,  $\alpha$ -GlcN,  $\alpha$ -Gal, and  $\alpha$ -GalN spends 2.3, 3.7, 3.1, 1.3% of the time, respectively, in a conformation other than chair.



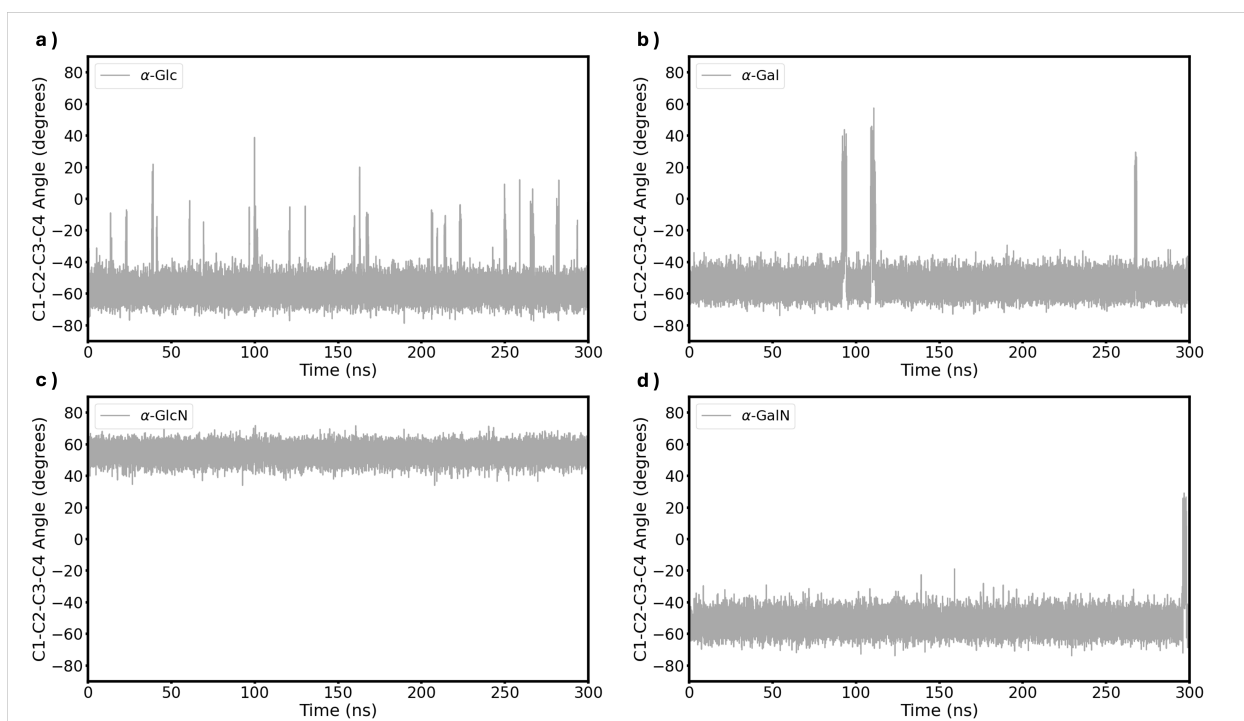

Figure S12: Time evolution of the torsion angle  $C_1 - C_2 - C_3 - C_4$  in  $\alpha$ -Glc, GlcN, Gal, and GalN during 300 ns, second replicate.  $C_1 - C_2 - C_3 - C_4$  is  $-55^\circ$  when in chair conformation. a)  $\alpha$ -Glc, b)  $\alpha$ -GlcN, c)  $\alpha$ -GlcNAc, d)  $\alpha$ -Gal. Overall,  $\alpha$ -Glc,  $\alpha$ -GlcN,  $\alpha$ -Gal, and  $\alpha$ -GalN spends 1.7, 0.01, 2.0, 0.8% of the time, respectively, in a conformation other than chair.
